# Supplementary material for: Comparison of the catalytic performance of Au/TiO2 prepared by in situ photodeposition and deposition precipitation methods for CO oxidation at room temperature under visible light irradiation
Source: Royal Society of Chemistry journal article supplement (doi:10.1039/d1cy01829a), 2021-11-02
Supplement: d1cy01829a1.pdf [file d1cy01829a1.pdf]

## Supplementary Information(SI)

### Comparison of the catalytic performance of Au/TiO<sub>2</sub> prepared by *in situ* photo-deposition and deposition precipitation methods for CO oxidation at room temperature under visible light irradiation

Qiuzhong Li, <sup>a,b</sup> Caijie Wu <sup>a,c</sup>, Ke Wang <sup>a,c</sup>, Xiaoxiao Wang <sup>a,c</sup>, Xun Chen <sup>a,c</sup>, Wenxin Dai <sup>\*a,c</sup>, and Xianzhi Fu <sup>a</sup>

<sup>a</sup> Research Institute of Photocatalysis, State Key Laboratory of Photocatalysis on Energy and Environment, Fuzhou University, Fuzhou, 350108, China

<sup>b</sup> College of Chemistry and Material, Ningde Normal University, Ningde, 352100, China

<sup>c</sup> Qingyuan Innovation Laboratory, Quanzhou 362801, China

\*Corresponding author: Wenxin Dai & Xianzhi Fu

Tel & Fax: +86-591-22865893

E-mail: [daiwenxin@fzu.edu.cn](mailto:daiwenxin@fzu.edu.cn) & [xzfu@fzu.edu.cn](mailto:xzfu@fzu.edu.cn)

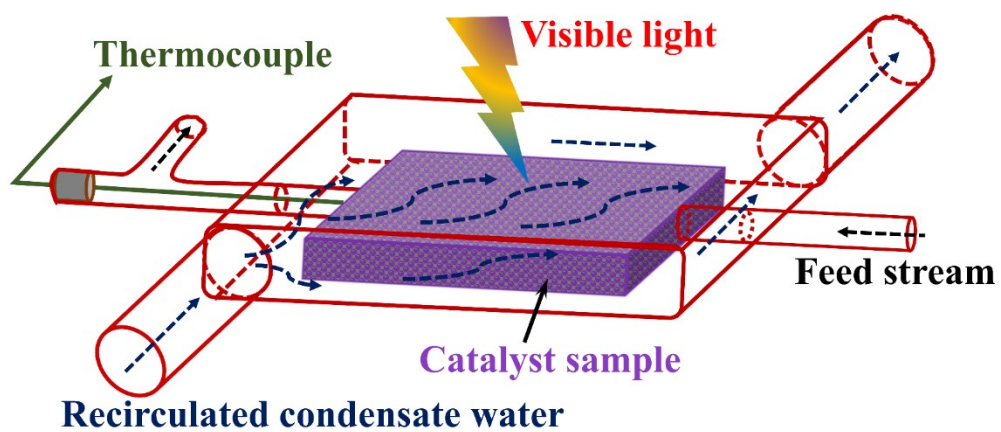

Scheme S1 The diagram of the catalytic reactor under visible light irradiation or not.

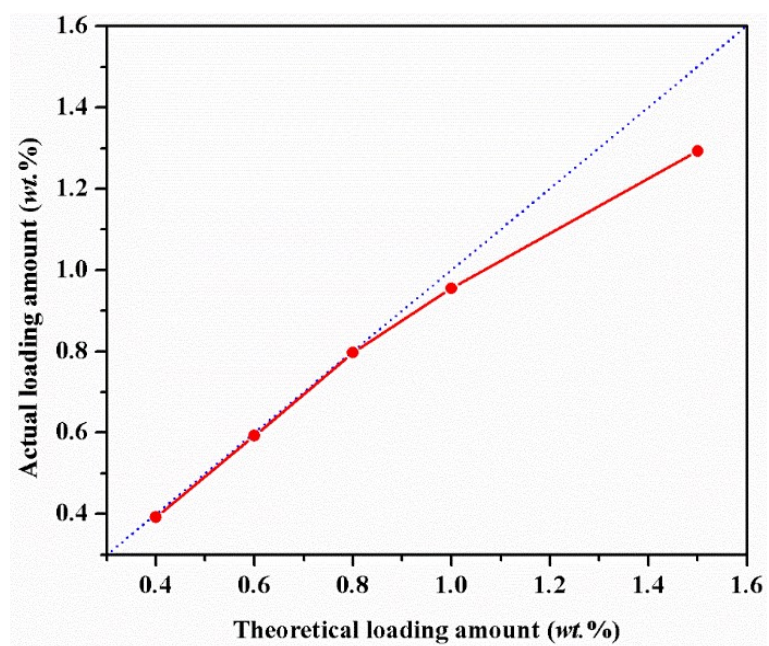

**Fig. S1** The curve of actual and theoretical load amount of Au for Au/TiO<sub>2</sub>-PD sample.

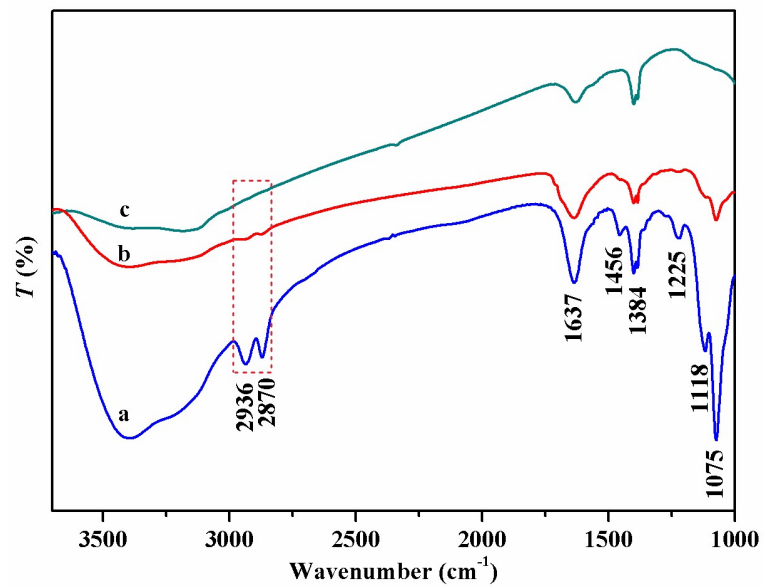

**Fig. S2** FT-IR spectroscopy of (a)  $\text{TiO}_2(\text{EG})$ , (b)  $\text{Au}/\text{TiO}_2(\text{EG})$  and (c)  $\text{Au}/\text{TiO}_2\text{-PD}$  samples.

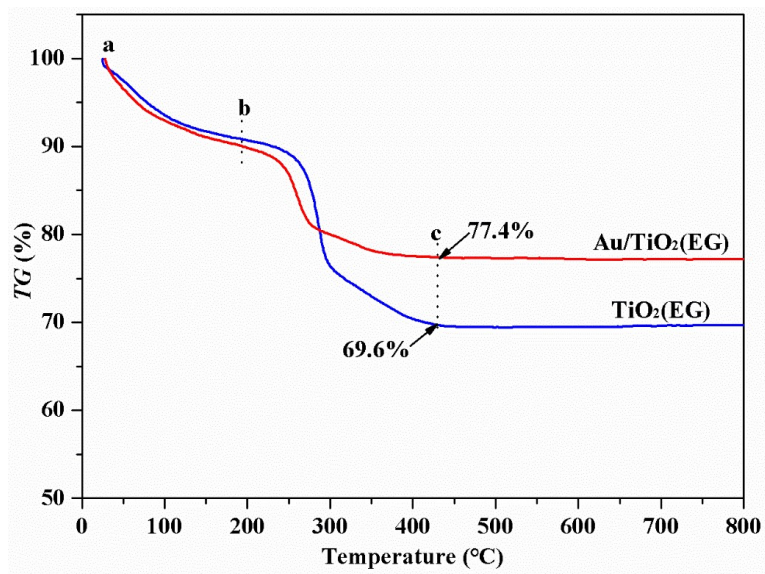

**Fig. S3** TG curves of TiO<sub>2</sub>(EG) and Au/TiO<sub>2</sub>(EG) samples.

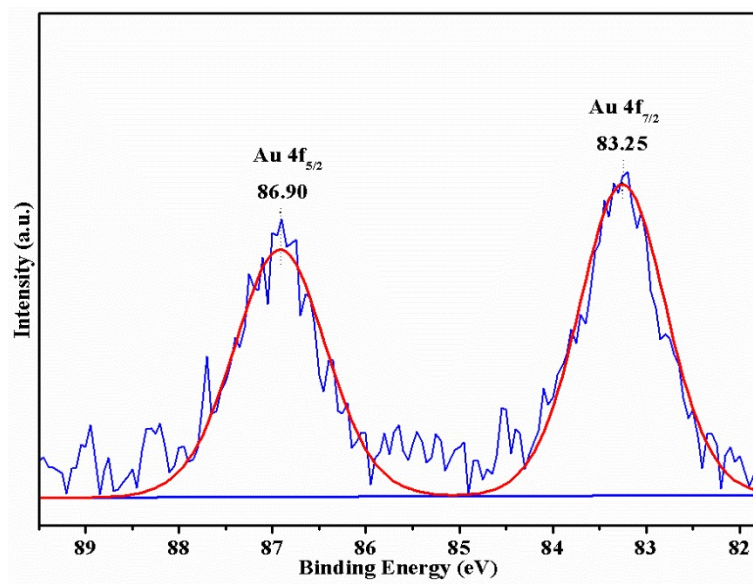

**Fig. S4** The XPS spectra of Au 4f for Au/TiO<sub>2</sub>(EG) samples.

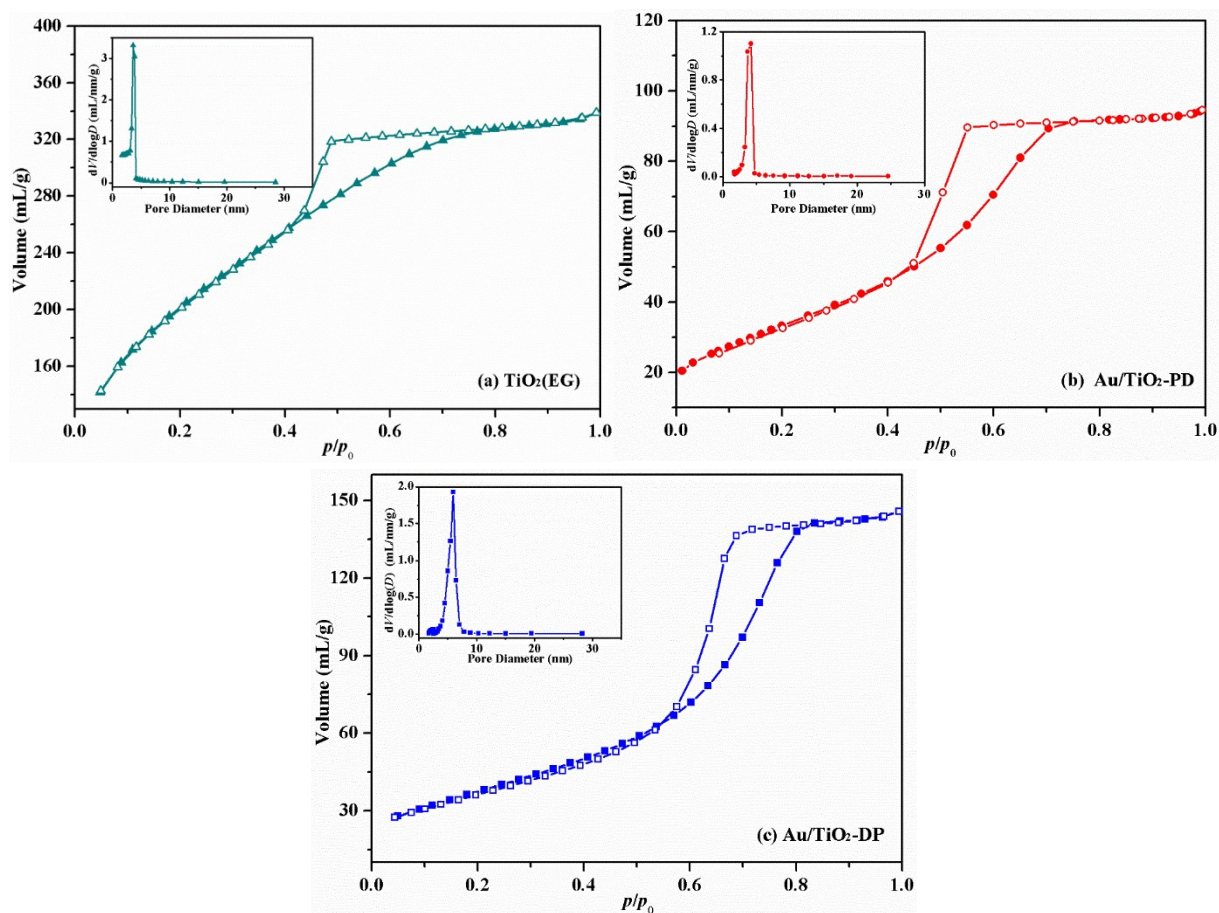

**Fig. S5** The adsorption-desorption isotherms and the BJH pore size distributions (inset) plots of (a)TiO<sub>2</sub> (EG), (b) Au/TiO<sub>2</sub>-PD and (c) Au/TiO<sub>2</sub>-DP samples.

**Table S1** The results of N<sub>2</sub> physical adsorption of TiO<sub>2</sub> (EG), Au/TiO<sub>2</sub>-PD and Au/TiO<sub>2</sub>-DP samples.

| Sample                  | BET Surface Area (m <sup>2</sup> g <sup>-1</sup> ) | pore Volume (mL g <sup>-1</sup> ) | Pore Size (nm) |
|-------------------------|----------------------------------------------------|-----------------------------------|----------------|
| TiO <sub>2</sub> (EG)   | 658                                                | 0.46                              | 2.8            |
| Au/TiO <sub>2</sub> -PD | 123                                                | 0.15                              | 4.7            |
| Au/TiO <sub>2</sub> -DP | 127                                                | 0.19                              | 5.4            |
